# Supplementary material for: Temporal Patterns and Clinical Significance of D-dimer Change Following Metabolic and Bariatric Surgery: A Systematic Review
Source: Research Square preprint supplement (doi:10.21203/rs.3.rs-8179725/v1), 2025-12-22
Supplement: Supplementary file 1 [file a6c4034f97b8f23eb71b4824.docx]

Table 1: Search Strategy

| Database | Search Strategy |
| --- | --- |
| PubMed (MEDLINE) | (("fibrin fragment D" [Supplementary Concept]) OR ("fibrin fragment D" OR "D-dimer" OR "di-dimers" OR "fibrin fragment D1 dimer" OR "fibrin fragment DD" OR " d dimer" OR "fibrin degradation product" OR "fibrin degradation products")) AND (("Bariatric Surgery"[Mesh]) OR ("Bariatric surgery" OR "Weight loss surgery" OR "Bariatric procedure" OR "Gastric bypass" OR "Roux-en-Y gastric bypass" OR "Roux en Y gastric bypass" OR "RYGB" OR "Sleeve gastrectomy" OR "gastric banding" OR "Adjustable gastric banding" OR "one anastomosis gastric bypass" OR "one-anastomosis gastric bypass" OR "Bariatric Surgical Procedure" OR "mini gastric bypass" OR "Metabolic surgery" OR "Bariatric metabolic surgery" OR "LAGB" OR "Obesity surgery" OR "biliopancreatic diversion with duodenal switch" OR "Duodenal switch in revisional bariatric" OR "Anastomosis Duodenal Switch" OR "Vertical banded gastroplasty" OR "Stomach Stapling")) |
| Embase | ('fibrin fragment d'/exp OR 'fibrin fragment d' OR 'd-dimer'/exp OR 'd-dimer' OR 'di-dimers' OR 'fibrin fragment d1 dimer' OR 'fibrin fragment dd' OR 'd dimer'/exp OR 'd dimer' OR 'fibrin degradation product'/exp OR 'fibrin degradation product' OR 'fibrin degradation products') AND ('bariatric surgery'/exp OR 'bariatric surgery' OR 'weight loss surgery'/exp OR 'weight loss surgery' OR 'bariatric procedure'/exp OR 'bariatric procedure' OR 'gastric bypass'/exp OR 'gastric bypass' OR 'roux-en-y gastric bypass'/exp OR 'roux-en-y gastric bypass' OR 'roux en y gastric bypass'/exp OR 'roux en y gastric bypass' OR 'rygb' OR 'sleeve gastrectomy'/exp OR 'sleeve gastrectomy' OR 'gastric banding'/exp OR 'gastric banding' OR 'adjustable gastric banding'/exp OR 'adjustable gastric banding' OR 'one anastomosis gastric bypass'/exp OR 'one anastomosis gastric bypass' OR 'one-anastomosis gastric bypass' OR 'bariatric surgical procedure'/exp OR 'bariatric surgical procedure' OR 'mini gastric bypass'/exp OR 'mini gastric bypass' OR 'metabolic surgery'/exp OR 'metabolic surgery' OR 'bariatric metabolic surgery' OR 'lagb' OR 'obesity surgery'/exp OR 'obesity surgery' OR 'biliopancreatic diversion with duodenal switch'/exp OR 'biliopancreatic diversion with duodenal switch' OR 'duodenal switch in revisional bariatric' OR 'anastomosis duodenal switch' OR 'vertical banded gastroplasty'/exp OR 'vertical banded gastroplasty' OR 'stomach stapling') |
| Scopus | ( ALL ( "fibrin fragment D" OR "D-dimer" OR "di-dimers" OR "fibrin fragment D1 dimer" OR "fibrin fragment DD" OR " d dimer" OR "fibrin degradation product" OR "fibrin degradation products" ) AND ALL ( "Bariatric surgery" OR "Weight loss surgery" OR "Bariatric procedure" OR "Gastric bypass" OR "Roux-en-Y gastric bypass" OR "Roux en Y gastric bypass" OR "RYGB" OR "Sleeve gastrectomy" OR "gastric banding" OR "Adjustable gastric banding" OR "one anastomosis gastric bypass" OR "one-anastomosis gastric bypass" OR "Bariatric Surgical Procedure" OR "mini gastric bypass" OR "Metabolic surgery" OR "Bariatric metabolic surgery" OR "LAGB" OR "Obesity surgery" OR "biliopancreatic diversion with duodenal switch" OR "Duodenal switch in revisional bariatric" OR "Anastomosis Duodenal Switch" OR "Vertical banded gastroplasty" OR "Stomach Stapling" ) ) |
| Web of Science | "fibrin fragment D" OR "D-dimer" OR "di-dimers" OR "fibrin fragment D1 dimer" OR "fibrin fragment DD" OR " d dimer" OR "fibrin degradation product" OR "fibrin degradation products" (Topic) AND "Bariatric surgery" OR "Weight loss surgery" OR "Bariatric procedure" OR "Gastric bypass" OR "Roux-en-Y gastric bypass" OR "Roux en Y gastric bypass" OR "RYGB" OR "Sleeve gastrectomy" OR "gastric banding" OR "Adjustable gastric banding" OR "one anastomosis gastric bypass" OR "one-anastomosis gastric bypass" OR "Bariatric Surgical Procedure" OR "mini gastric bypass" OR "Metabolic surgery" OR "Bariatric metabolic surgery" OR "LAGB" OR "Obesity surgery" OR "biliopancreatic diversion with duodenal switch" OR "Duodenal switch in revisional bariatric" OR "Anastomosis Duodenal Switch" OR "Vertical banded gastroplasty" OR "Stomach Stapling" (All Fields) |
| Cochrane Library | ("fibrin fragment D" OR "D-dimer" OR "di-dimers" OR "fibrin fragment D1 dimer" OR "fibrin fragment DD" OR " d dimer" OR "fibrin degradation product" OR "fibrin degradation products") AND ("Bariatric surgery" OR "Weight loss surgery" OR "Bariatric procedure" OR "Gastric bypass" OR "Roux-en-Y gastric bypass" OR "Roux en Y gastric bypass" OR "RYGB" OR "Sleeve gastrectomy" OR "gastric banding" OR "Adjustable gastric banding" OR "one anastomosis gastric bypass" OR "one-anastomosis gastric bypass" OR "Bariatric Surgical Procedure" OR "mini gastric bypass" OR "Metabolic surgery" OR "Bariatric metabolic surgery" OR "LAGB" OR "Obesity surgery" OR "biliopancreatic diversion with duodenal switch" OR "Duodenal switch in revisional bariatric" OR "Anastomosis Duodenal Switch" OR "Vertical banded gastroplasty" OR "Stomach Stapling") |

Table 2. Risk of Bias Assessment using NOS

| Study  (year) | Design | Selection  (0-4★) | Comparability  (0-2★) | Outcome/Exposure  (0-3★) | Overall Score  (0-9★) | Quality (High/Moderate/Low) |
| --- | --- | --- | --- | --- | --- | --- |
| Nestvold 2015 (1) | Prospective Cohort | 3/4★ | 1/2★ | 2/3★ | 7/9★ | High |
| Lupoli 2015 (2) | Prospective Cohort | 4/4★ | 1/2★ | 1/3★ | 6/9★ | Moderate |
| Iwan-Ziętek 2017 (3) | Prospective Cohort | 3/4★ | 1/2★ | 2/3★ | 6/9★ | Moderate |
| Kupcinskiene 2017 (4) | Prospective Cohort | 4/4★ | 1/2★ | 3/3★ | 8/9★ | High |
| Tuovila 2018 (5) | Prospective Cohort | 3/4★ | 2/2★ | 3/3★ | 8/9★ | High |
| Liu 2020 (6) | Prospective Cohort | 3/4★ | 1/2★ | 2/3★ | 6/9★ | Moderate |
| **Taha (2023)** | Prospective Cohort | 2/4★ | 0/2★ | 2/3★ | 4/9★ | Moderate |

Table 3: RoB 2 assessment

| Study  (year) | **Domain** | **Judgment** |
| --- | --- | --- |
| Nguyen 2001 (7) | **1. Randomization process** | Some concerns |
| **2. Deviations from intended interventions (effect of assignment)** | Some concerns |
| **3. Missing outcome data** | Low risk |
| **4. Measurement of the outcome** | Low risk |
| **5. Selection of the reported result** | Some concerns |
| **Overall risk of bias** | Some concerns |

Table 4. GRADE Summary

| **Outcome** | **No. of studies (patients)** | **Study Design** | **Risk of bias** | **Inconsistency** | **Indirectness** | **Imprecision** | **Certainty of evidence** |
| --- | --- | --- | --- | --- | --- | --- | --- |
| Postoperative D-dimer change | 8 studies (522 patients) | 1 RCT, 7 cohort studies | Not serious | Serious | Not serious | Not serious | Moderate |
| Peak D-dimer timing | 8 studies (522 patients) | 1 RCT, 7 cohort studies | Not serious | Serious | Not serious | Not serious | Moderate |
| VTE incidence | 6 studies (432 patients) | 1 RCT, 5 cohort studies | Not serious | Not serious | Serious² | Very serious | Low |
| Relationship between D-dimer elevation and VTE risk | 6 studies (432 patients) ᵃ | 1 RCT, 5 cohort studies | Serious | Very serious | Very serious | Very serious | Very low |
| Fibrinogen changes | 6 studies (384 patients) | 1 RCT, 5 cohort studies | Not serious | Serious | Not serious | Not serious | Moderate |
| Vitamin K-dependent factor deficiencies | 2 studies (184 patients) | Cohort studies | Not serious | Not serious | Not serious | Serious⁹ | Low |
| Persistent hypercoagulability at 6 months | 1 study (18 patients) | Observational pilot | Not serious | Not assessable | Not serious | Very serious | Very low |

1. Nestvold TK, Nielsen EW, Ludviksen JK, Fure H, Landsem A, Lappegård KT. Lifestyle changes followed by bariatric surgery lower inflammatory markers and the cardiovascular risk factors C3 and C4. Metabolic syndrome and related disorders. 2015;13(1):29-35.

2. Lupoli R, Milone M, Di Minno A, Maietta P, Ambrosino P, Musella M, et al. Haemostatic and fibrinolytic changes in obese subjects undergoing bariatric surgery: the effect of different surgical procedures. Blood Transfusion. 2014;13(3):442.

3. Iwan-Ziętek I, Michalska M, Góralczyk K, Ruszkowska-Ciastek B, Dąbrowiecki S, Ziętek Z, et al. Effect of bariatric surgery on fibrinolysis process in morbidly obese patients. Medical Science and Technology. 2017;58:91-7.

4. Kupcinskiene K, Trepenaitis D, Petereit R, Kupcinskas J, Gudaityte R, Maleckas A, et al. Monitoring of hypercoagulability by thromboelastography in bariatric surgery. Medical Science Monitor: International Medical Journal of Experimental and Clinical Research. 2017;23:1819.

5. Tuovila M, Erkinaro T, Koivukangas V, Savolainen E-R, Laurila P, Ohtonen P, et al. Thromboelastography values remain hypercoagulative 6 months after obesity surgery: a pilot study. Obesity Surgery. 2018;28(12):3943-9.

6. Liu C, Han Z, Zhang N, Peng J, Zhu B, Amin B, et al. Laparoscopic sleeve gastrectomy affects coagulation system of obese patients. Obesity surgery. 2020;30(10):3989-96.

7. Nguyen NT, Owings JT, Gosselin R, Pevec WC, Lee SJ, Goldman C, et al. Systemic coagulation and fibrinolysis after laparoscopic and open gastric bypass. Archives of surgery. 2001;136(8):909-16.
